# Supplementary material for: Efficacy of prophylactic human papillomavirus vaccines on cervical cancer among the Asian population: A meta-analysis
Source: Frontiers journal article supplement (doi:10.3389/fmicb.2022.1052324), 2022-12-02
Supplement: Table_2.doc [file Table_2.doc]

**Table 2**. Sensitivity analysis results of the efficacy of HPV vaccine on cervical cancer among the Asian population

| Studies | Variation range  of the RR value | Upper limit  of the 95% CI value |
| --- | --- | --- |
| HPV vaccine & the incidence of CIN1+ | 0.05-0.10 | 0.29 |
| HPV vaccine & the incidence of CIN2+ | 0.06-0.13 | 0.43 |
| HPV vaccine & the incidence of 6 PI | 0.04-0.06 | 0.12 |
| HPV vaccine & the incidence of 12 PI | 0.06-0.10 | 0.26 |
| HPV vaccine & the incidence of any cytological abnormality (ASC-US+) | 0.13-0.15 | 0.31 |
